# Supplementary material for: Formulation and Characterization of Antimicrobial Edible Films Based on Whey Protein Isolate and Tarragon Essential Oil
Source: PubMed Central journal article supplement (PMC7464654; doi:10.3390/polym12081748), 2020-08-05
Supplement: polymers-12-01748-s001.pdf [file polymers-12-01748-s001.pdf]

**Table S1.** Effects of heat-treatment of the film-forming solution, the addition of tarragon essential oil, and their first-degree interaction on thickness, moisture content, swelling degree, solubility in water, and WVP of edible films.

| Factor                                              | Thickness (mm)             | Moisture Content (%)       | Swelling Degree (%)        | Solubility in Water (%)    | WVP (g mm/m <sup>2</sup> day kPa) |
|-----------------------------------------------------|----------------------------|----------------------------|----------------------------|----------------------------|-----------------------------------|
| Heat-treatment                                      |                            |                            |                            |                            |                                   |
| UNT                                                 | 0.43 <sup>b</sup>          | 45.8 <sup>b</sup>          | 100.5 <sup>b</sup>         | 97.5 <sup>a</sup>          | 7.6 <sup>b</sup>                  |
| HT                                                  | 0.46 <sup>a</sup>          | 52.9 <sup>a</sup>          | 101.4 <sup>a</sup>         | 96.7 <sup>b</sup>          | 8.5 <sup>a</sup>                  |
| <i>p</i> /CTR (%)                                   | 0.000 <sup>***</sup> /21.8 | 0.000 <sup>***</sup> /45.2 | 0.000 <sup>***</sup> /68.1 | 0.000 <sup>***</sup> /14.5 | 0.003 <sup>**</sup> /19.9         |
| Addition of tarragon essential oil                  |                            |                            |                            |                            |                                   |
| C                                                   | 0.45 <sup>a</sup>          | 46.2 <sup>c</sup>          | 100.8 <sup>ab</sup>        | 95.3 <sup>a</sup>          | 7.5 <sup>a</sup>                  |
| F0.5                                                | 0.45 <sup>a</sup>          | 46.3 <sup>c</sup>          | 101.1 <sup>a</sup>         | 96.8 <sup>c</sup>          | 7.4 <sup>a</sup>                  |
| F1                                                  | 0.44 <sup>a</sup>          | 48.8 <sup>bc</sup>         | 101.1 <sup>a</sup>         | 97.1 <sup>bc</sup>         | 8.0 <sup>a</sup>                  |
| F1.5                                                | 0.45 <sup>a</sup>          | 50.6 <sup>ab</sup>         | 100.6 <sup>b</sup>         | 97.3 <sup>b</sup>          | 8.2 <sup>a</sup>                  |
| F2                                                  | 0.44 <sup>a</sup>          | 51.4 <sup>ab</sup>         | 101.0 <sup>ab</sup>        | 97.9 <sup>a</sup>          | 8.7 <sup>a</sup>                  |
| F2.5                                                | 0.44 <sup>a</sup>          | 53.0 <sup>a</sup>          | 100.9 <sup>ab</sup>        | 98.0 <sup>a</sup>          | 8.5 <sup>a</sup>                  |
| <i>p</i> /CTR (%)                                   | 0.606 <sup>NS</sup> /1.0   | 0.000 <sup>***</sup> /23.7 | 0.005 <sup>**</sup> /9.2   | 0.000 <sup>***</sup> /68.7 | 0.026 <sup>*</sup> /27.8          |
| Heat-treatment x Addition of tarragon essential oil |                            |                            |                            |                            |                                   |
| UNT x C                                             | 0.44±0.02 <sup>abc</sup>   | 44.2±1.81 <sup>ef</sup>    | 100.5±0.07 <sup>ef</sup>   | 95.6±0.18 <sup>e</sup>     | 7.7±0.14 <sup>abc</sup>           |
| UNT x F0.5                                          | 0.44±0.01 <sup>bc</sup>    | 40.4±7.12 <sup>f</sup>     | 100.4±0.01 <sup>f</sup>    | 96.7±0.15 <sup>d</sup>     | 6.7±0.50 <sup>c</sup>             |
| UNT x F1                                            | 0.43±0.02 <sup>c</sup>     | 44.1±2.24 <sup>ef</sup>    | 100.4±0.04 <sup>f</sup>    | 97.1±0.09 <sup>cd</sup>    | 6.9±0.07 <sup>c</sup>             |
| UNT x F1.5                                          | 0.43±0.02 <sup>c</sup>     | 49.4±1.12 <sup>bcd</sup>   | 100.4±0.09 <sup>f</sup>    | 97.9±0.12 <sup>bc</sup>    | 8.3±0.35 <sup>abc</sup>           |
| HT x F2                                             | 0.43±0.01 <sup>c</sup>     | 46.4±2.75 <sup>def</sup>   | 100.4±0.11 <sup>f</sup>    | 98.9±0.12 <sup>a</sup>     | 7.8±0.14 <sup>abc</sup>           |
| UNT x F2.5                                          | 0.43±0.02 <sup>c</sup>     | 50.6±2.06 <sup>abcde</sup> | 100.6±0.04 <sup>def</sup>  | 98.6±0.21 <sup>ab</sup>    | 8.7±0.07 <sup>abc</sup>           |
| HT x C                                              | 0.45±0.03 <sup>ab</sup>    | 48.1±0.62 <sup>cde</sup>   | 101.1±0.03 <sup>cde</sup>  | 95.0±0.37 <sup>e</sup>     | 7.3±0.50 <sup>bc</sup>            |
| HT x F0.5                                           | 0.45±0.02 <sup>ab</sup>    | 52.1±1.89 <sup>abcd</sup>  | 101.7±0.08 <sup>ab</sup>   | 96.8±0.17 <sup>d</sup>     | 8.2±1.20 <sup>abc</sup>           |
| HT x F1                                             | 0.46±0.02 <sup>ab</sup>    | 53.5±2.03 <sup>abc</sup>   | 101.9±0.23 <sup>a</sup>    | 97.1±0.07 <sup>cd</sup>    | 9.3±0.64 <sup>ab</sup>            |
| HT x F1.5                                           | 0.46±0.03 <sup>a</sup>     | 51.8±0.80 <sup>abcd</sup>  | 100.9±0.17 <sup>def</sup>  | 96.8±0.50 <sup>d</sup>     | 8.2±0.71 <sup>abc</sup>           |
| HT x F2                                             | 0.46±0.02 <sup>ab</sup>    | 56.4±1.12 <sup>a</sup>     | 101.6±0.61 <sup>abc</sup>  | 96.8±0.47 <sup>d</sup>     | 9.6±0.71 <sup>a</sup>             |
| HT x F2.5                                           | 0.46±0.02 <sup>ab</sup>    | 55.5±2.78 <sup>ab</sup>    | 101.2±0.29 <sup>bcd</sup>  | 97.4±0.42 <sup>cd</sup>    | 8.5±0.35 <sup>abc</sup>           |
| <i>p</i> /CTR (%)                                   | 0.044 <sup>*</sup> /3.1    | 0.007 <sup>**</sup> /10.9  | 0.001 <sup>**</sup> /12.8  | 0.000 <sup>***</sup> /12.3 | 0.012 <sup>*</sup> /35.0          |

UNT-untreated films; HT-heat-treated films; C-control film; F0.5-film with 0.5% tarragon essential oil; F1-film with 1% tarragon essential oil; F1.5-film with 1.5% tarragon essential oil; F2-film with 2% tarragon essential oil; F2.5-film with 2.5% tarragon essential oil; WVP-water vapor permeability; *p*-probability; CTR (%) -percentage contribution. Values are expressed as mean ± standard deviation of twenty-four replicates for thickness, four for moisture content, respectively three replicates for swelling degree, solubility in water, and WVP. Different letters in the same column indicate statistically significant differences at *p* < 0.05 (Tukey's test). Significance: *p* ≥ 0.05<sup>NS</sup>, not significant; *p* < 0.05<sup>\*</sup>, significant; *p* < 0.01<sup>\*\*</sup>, very significant; *p* < 0.001<sup>\*\*\*</sup>, extremely significant.

**Table S2.** Effects of heat-treatment of the film-forming solution, the addition of tarragon essential oil, and their first-degree interaction on color parameters and transparency of edible films.

| Factor                                              | Color Parameters           |                            |                            |                            | Transparency (A600/mm)     |
|-----------------------------------------------------|----------------------------|----------------------------|----------------------------|----------------------------|----------------------------|
|                                                     | $L^*$                      | $a^*$                      | $b^*$                      | $\Delta E^*$               |                            |
| Heat-treatment                                      |                            |                            |                            |                            |                            |
| UNT                                                 | 81.27 <sup>a</sup>         | 2.80 <sup>a</sup>          | 18.05 <sup>b</sup>         | 23.06 <sup>b</sup>         | 0.9 <sup>b</sup>           |
| HT                                                  | 79.51 <sup>b</sup>         | 2.12 <sup>b</sup>          | 20.72 <sup>a</sup>         | 26.13 <sup>a</sup>         | 1.8 <sup>a</sup>           |
| <i>p</i> /CTR (%)                                   | 0.000 <sup>***</sup> /27.5 | 0.000 <sup>***</sup> /13.3 | 0.000 <sup>***</sup> /16.6 | 0.000 <sup>***</sup> /20.2 | 0.000 <sup>***</sup> /26.3 |
| Addition of tarragon essential oil                  |                            |                            |                            |                            |                            |
| C                                                   | 81.98 <sup>a</sup>         | 1.77 <sup>d</sup>          | 15.38 <sup>d</sup>         | 20.30 <sup>d</sup>         | 0.9 <sup>b</sup>           |
| F0.5                                                | 80.33 <sup>c</sup>         | 2.03 <sup>cd</sup>         | 18.27 <sup>c</sup>         | 23.55 <sup>c</sup>         | 0.6 <sup>b</sup>           |
| F1                                                  | 81.12 <sup>b</sup>         | 1.81 <sup>d</sup>          | 18.05 <sup>c</sup>         | 23.05 <sup>c</sup>         | 1.1 <sup>b</sup>           |
| F1.5                                                | 80.13 <sup>cd</sup>        | 2.29 <sup>c</sup>          | 19.39 <sup>b</sup>         | 24.65 <sup>b</sup>         | 1.7 <sup>a</sup>           |
| F2                                                  | 79.57 <sup>de</sup>        | 3.17 <sup>b</sup>          | 22.47 <sup>a</sup>         | 27.79 <sup>a</sup>         | 2.0 <sup>a</sup>           |
| F2.5                                                | 79.22 <sup>e</sup>         | 3.68 <sup>a</sup>          | 22.75 <sup>a</sup>         | 28.22 <sup>a</sup>         | 1.9 <sup>a</sup>           |
| <i>p</i> /CTR (%)                                   | 0.000 <sup>***</sup> /30.6 | 0.000 <sup>***</sup> /60.4 | 0.000 <sup>***</sup> /61.9 | 0.000 <sup>***</sup> /65.0 | 0.000 <sup>***</sup> /34.7 |
| Heat-treatment x Addition of tarragon essential oil |                            |                            |                            |                            |                            |
| UNT x C                                             | 84.46±0.89 <sup>a</sup>    | 1.66±0.70 <sup>f</sup>     | 14.75±0.96 <sup>g</sup>    | 18.67±1.07 <sup>f</sup>    | 1.3±0.50 <sup>cd</sup>     |
| UNT x F0.5                                          | 81.11±0.68 <sup>b</sup>    | 2.49±0.31 <sup>cd</sup>    | 16.13±1.04 <sup>f</sup>    | 21.33±1.16 <sup>d</sup>    | 0.5±0.06 <sup>cd</sup>     |
| UNT x F1                                            | 80.91±0.65 <sup>b</sup>    | 2.06±0.30 <sup>cdef</sup>  | 14.41±0.67 <sup>g</sup>    | 19.87±0.62 <sup>e</sup>    | 0.6±0.13 <sup>cd</sup>     |
| UNT x F1.5                                          | 80.54±0.49 <sup>bcd</sup>  | 2.60±0.15 <sup>c</sup>     | 17.52±0.55 <sup>g</sup>    | 22.83±0.52 <sup>c</sup>    | 1.0±0.10 <sup>cd</sup>     |
| HT x F2                                             | 80.70±1.09 <sup>bc</sup>   | 3.95±0.83 <sup>c</sup>     | 22.61±0.30 <sup>ab</sup>   | 27.57±0.56 <sup>a</sup>    | 1.2±0.28 <sup>cd</sup>     |
| UNT x F2.5                                          | 79.90±0.53 <sup>cde</sup>  | 4.02±0.22 <sup>c</sup>     | 22.89±0.32 <sup>a</sup>    | 28.11±0.34 <sup>a</sup>    | 0.8±0.23 <sup>cd</sup>     |
| HT x C                                              | 79.50±0.38 <sup>ef</sup>   | 1.88±0.29 <sup>ef</sup>    | 16.01±0.21 <sup>f</sup>    | 21.93±0.31 <sup>cd</sup>   | 0.5±0.08 <sup>d</sup>      |
| HT x F0.5                                           | 79.54±1.19 <sup>de</sup>   | 1.57±0.21 <sup>f</sup>     | 20.41±1.13 <sup>d</sup>    | 25.78±1.07 <sup>b</sup>    | 0.8±0.08 <sup>cd</sup>     |
| HT x F1                                             | 81.34±1.03 <sup>b</sup>    | 1.55±0.42 <sup>f</sup>     | 21.69±1.18 <sup>bc</sup>   | 26.22±1.36 <sup>b</sup>    | 1.5±0.25 <sup>bc</sup>     |
| HT x F1.5                                           | 79.72±0.47 <sup>cde</sup>  | 1.97±0.27 <sup>def</sup>   | 21.26±0.47 <sup>cd</sup>   | 26.48±0.39 <sup>b</sup>    | 2.5±0.78 <sup>ab</sup>     |
| HT x F2                                             | 78.45±0.42 <sup>g</sup>    | 2.40±0.24 <sup>cde</sup>   | 22.34±0.37 <sup>ab</sup>   | 28.02±0.39 <sup>a</sup>    | 2.8±0.71 <sup>a</sup>      |
| HT x F2.5                                           | 78.53±0.33 <sup>fg</sup>   | 3.35±0.45 <sup>b</sup>     | 22.62±0.41 <sup>ab</sup>   | 28.34±0.40 <sup>a</sup>    | 2.9±0.07 <sup>a</sup>      |
| <i>p</i> /CTR (%)                                   | 0.000 <sup>***</sup> /24.2 | 0.000 <sup>***</sup> /8.0  | 0.000 <sup>***</sup> /17.1 | 0.000 <sup>***</sup> /10.0 | 0.000 <sup>***</sup> /28.0 |

UNT-untreated films; HT-heat-treated films; C-control film; F0.5-film with 0.5% tarragon essential oil; F1-film with 1% tarragon essential oil; F1.5-film with 1.5% tarragon essential oil; F2-film with 2% tarragon essential oil; F2.5-film with 2.5% tarragon essential oil; *p*-probability; CTR (%) -percentage contribution. Values are expressed as mean ± standard deviation of twelve replicates for color parameters and three replicates for transparency. Different letters in the same column indicate statistically significant differences at  $p < 0.05$  (Tukey's test). Significance:  $p < 0.001$ <sup>\*\*\*</sup>, extremely significant.

**Table S3.** Effects of heat-treatment of the film-forming solution, the addition of tarragon essential oil, and their first-degree interaction on light transmittance of edible films.

| Factor                                              | Light Transmittance (%)    |                            |                            |                            |                            |                            |                            |                            |                            |                            |                            |                            |                            |
|-----------------------------------------------------|----------------------------|----------------------------|----------------------------|----------------------------|----------------------------|----------------------------|----------------------------|----------------------------|----------------------------|----------------------------|----------------------------|----------------------------|----------------------------|
|                                                     | at 200 nm                  | at 250 nm                  | at 300 nm                  | at 350 nm                  | at 400 nm                  | at 450 nm                  | at 500 nm                  | at 550 nm                  | at 600 nm                  | at 650 nm                  | at 700 nm                  | at 750 nm                  | at 800 nm                  |
| Heat-treatment                                      |                            |                            |                            |                            |                            |                            |                            |                            |                            |                            |                            |                            |                            |
| UNT                                                 | 0.06 <sup>b</sup>          | 0.04 <sup>b</sup>          | 0.07 <sup>b</sup>          | 6.23 <sup>a</sup>          | 25.37 <sup>a</sup>         | 36.89 <sup>a</sup>         | 44.19 <sup>a</sup>         | 48.88 <sup>a</sup>         | 51.66 <sup>a</sup>         | 53.21 <sup>a</sup>         | 54.29 <sup>a</sup>         | 54.88 <sup>a</sup>         | 55.34 <sup>a</sup>         |
| HT                                                  | 0.35 <sup>a</sup>          | 0.27 <sup>a</sup>          | 0.27 <sup>a</sup>          | 2.77 <sup>b</sup>          | 12.83 <sup>b</sup>         | 20.02 <sup>b</sup>         | 24.29 <sup>b</sup>         | 27.07 <sup>b</sup>         | 28.01 <sup>b</sup>         | 28.98 <sup>b</sup>         | 29.71 <sup>b</sup>         | 30.11 <sup>b</sup>         | 30.53 <sup>b</sup>         |
| <i>p</i> /CTR (%)                                   | 0.000 <sup>***</sup> /66.6 | 0.000 <sup>***</sup> /71.9 | 0.000 <sup>***</sup> /58.4 | 0.000 <sup>***</sup> /19.2 | 0.000 <sup>***</sup> /28.0 | 0.000 <sup>***</sup> /28.1 | 0.000 <sup>***</sup> /28.1 | 0.000 <sup>***</sup> /28.8 | 0.000 <sup>***</sup> /30.1 | 0.000 <sup>***</sup> /30.1 | 0.000 <sup>***</sup> /30.3 | 0.000 <sup>***</sup> /30.0 | 0.000 <sup>***</sup> /29.7 |
| Addition of tarragon essential oil                  |                            |                            |                            |                            |                            |                            |                            |                            |                            |                            |                            |                            |                            |
| C                                                   | 0.33 <sup>a</sup>          | 0.15 <sup>a</sup>          | 0.26 <sup>a</sup>          | 7.74 <sup>a</sup>          | 28.73 <sup>a</sup>         | 41.35 <sup>a</sup>         | 47.43 <sup>ab</sup>        | 51.83 <sup>ab</sup>        | 54.55 <sup>a</sup>         | 56.04 <sup>a</sup>         | 57.15 <sup>a</sup>         | 57.87 <sup>a</sup>         | 58.59 <sup>a</sup>         |
| F0.5                                                | 0.18 <sup>ab</sup>         | 0.15 <sup>a</sup>          | 0.14 <sup>b</sup>          | 4.93 <sup>a</sup>          | 27.18 <sup>ab</sup>        | 41.35 <sup>a</sup>         | 50.24 <sup>a</sup>         | 55.63 <sup>a</sup>         | 58.69 <sup>a</sup>         | 60.34 <sup>a</sup>         | 61.44 <sup>a</sup>         | 61.94 <sup>a</sup>         | 62.17 <sup>a</sup>         |
| F1                                                  | 0.20 <sup>ab</sup>         | 0.18 <sup>a</sup>          | 0.19 <sup>ab</sup>         | 4.10 <sup>ab</sup>         | 18.76 <sup>bc</sup>        | 28.40 <sup>b</sup>         | 35.15 <sup>bc</sup>        | 40.13 <sup>bc</sup>        | 40.73 <sup>b</sup>         | 42.27 <sup>b</sup>         | 43.50 <sup>b</sup>         | 43.99 <sup>b</sup>         | 44.52 <sup>b</sup>         |
| F1.5                                                | 0.19 <sup>ab</sup>         | 0.16 <sup>a</sup>          | 0.16 <sup>ab</sup>         | 4.46 <sup>ab</sup>         | 16.76 <sup>c</sup>         | 24.06 <sup>bc</sup>        | 28.35 <sup>cd</sup>        | 30.58 <sup>cd</sup>        | 31.90 <sup>bc</sup>        | 32.64 <sup>bc</sup>        | 33.12 <sup>bc</sup>        | 33.42 <sup>bc</sup>        | 33.70 <sup>bc</sup>        |
| F2                                                  | 0.19 <sup>ab</sup>         | 0.15 <sup>a</sup>          | 0.15 <sup>b</sup>          | 0.90 <sup>b</sup>          | 7.08 <sup>d</sup>          | 14.09 <sup>c</sup>         | 19.68 <sup>d</sup>         | 23.54 <sup>d</sup>         | 26.01 <sup>c</sup>         | 27.57 <sup>c</sup>         | 28.71 <sup>c</sup>         | 29.48 <sup>c</sup>         | 30.14 <sup>c</sup>         |
| F2.5                                                | 0.16 <sup>b</sup>          | 0.13 <sup>a</sup>          | 0.12 <sup>b</sup>          | 4.89 <sup>a</sup>          | 16.06 <sup>c</sup>         | 21.49 <sup>bc</sup>        | 24.58 <sup>cd</sup>        | 26.13 <sup>d</sup>         | 27.12 <sup>c</sup>         | 27.71 <sup>c</sup>         | 28.08 <sup>c</sup>         | 28.29 <sup>c</sup>         | 28.51 <sup>c</sup>         |
| <i>p</i> /CTR (%)                                   | 0.058 <sup>NS</sup> /10.3  | 0.727 <sup>NS</sup> /1.5   | 0.007 <sup>**</sup> /12.4  | 0.001 <sup>**</sup> /25.5  | 0.000 <sup>***</sup> /37.7 | 0.000 <sup>***</sup> /39.9 | 0.000 <sup>***</sup> /36.5 | 0.000 <sup>***</sup> /36.8 | 0.000 <sup>***</sup> /35.5 | 0.000 <sup>***</sup> /35.1 | 0.000 <sup>***</sup> /35.1 | 0.000 <sup>***</sup> /34.8 | 0.000 <sup>***</sup> /34.6 |
| Heat-treatment x Addition of tarragon essential oil |                            |                            |                            |                            |                            |                            |                            |                            |                            |                            |                            |                            |                            |
| UNT x C                                             | 0.24±0.26 <sup>abc</sup>   | 0.14±0.07 <sup>bc</sup>    | 0.26±0.13 <sup>a</sup>     | 11.13±3.95 <sup>a</sup>    | 29.83±9.98 <sup>a</sup>    | 37.85±12.16 <sup>ab</sup>  | 39.21±17.10 <sup>abc</sup> | 41.86±17.36 <sup>abc</sup> | 43.45±17.03 <sup>bc</sup>  | 44.02±17.09 <sup>bc</sup>  | 44.53±16.91 <sup>bc</sup>  | 44.91±16.67 <sup>cd</sup>  | 45.20±16.52 <sup>cd</sup>  |
| UNT x F0.5                                          | 0.06±0.08 <sup>bc</sup>    | 0.04±0.06 <sup>c</sup>     | 0.05±0.04 <sup>bc</sup>    | 2.86±1.28 <sup>cde</sup>   | 26.38±5.61 <sup>a</sup>    | 42.80±6.34 <sup>a</sup>    | 54.60±6.03 <sup>a</sup>    | 62.12±5.67 <sup>a</sup>    | 66.27±5.34 <sup>a</sup>    | 68.54±5.35 <sup>a</sup>    | 70.02±5.37 <sup>a</sup>    | 70.61±5.38 <sup>ab</sup>   | 70.65±5.10 <sup>ab</sup>   |
| UNT x F1                                            | 0.01±0.0 <sup>c</sup>      | 0.01±0.0 <sup>c</sup>      | 0.03±0.0 <sup>c</sup>      | 4.90±1.19 <sup>abcde</sup> | 25.76±1.17 <sup>a</sup>    | 39.31±4.31 <sup>a</sup>    | 49.49±4.98 <sup>ab</sup>   | 55.44±5.51 <sup>ab</sup>   | 58.85±5.72 <sup>ab</sup>   | 60.81±5.70 <sup>ab</sup>   | 62.17±5.68 <sup>ab</sup>   | 62.88±5.61 <sup>abc</sup>  | 63.70±5.53 <sup>abc</sup>  |
| UNT x F1.5                                          | 0.02±0.02 <sup>bc</sup>    | 0.02±0.02 <sup>c</sup>     | 0.03±0.01 <sup>c</sup>     | 8.26±1.46 <sup>abc</sup>   | 29.79±0.88 <sup>a</sup>    | 40.75±1.13 <sup>a</sup>    | 46.94±1.91 <sup>ab</sup>   | 50.01±2.49 <sup>ab</sup>   | 51.89±2.75 <sup>ab</sup>   | 52.97±2.68 <sup>ab</sup>   | 53.67±2.72 <sup>ab</sup>   | 54.09±2.87 <sup>abc</sup>  | 54.41±2.77 <sup>abc</sup>  |
| HT x F2                                             | 0.02±0.01 <sup>bc</sup>    | 0.02±0.01 <sup>c</sup>     | 0.04±0.01 <sup>c</sup>     | 0.85±0.42 <sup>de</sup>    | 10.10±2.32 <sup>b</sup>    | 21.42±3.00 <sup>bc</sup>   | 30.81±3.92 <sup>bc</sup>   | 37.40±5.08 <sup>bc</sup>   | 41.54±5.96 <sup>bc</sup>   | 44.11±6.66 <sup>bc</sup>   | 46.03±7.12 <sup>bc</sup>   | 47.27±7.51 <sup>c</sup>    | 48.30±7.77 <sup>c</sup>    |
| UNT x F2.5                                          | 0.02±0.01 <sup>bc</sup>    | 0.02±0.01 <sup>c</sup>     | 0.03±0.01 <sup>c</sup>     | 9.39±3.75 <sup>ab</sup>    | 30.34±6.88 <sup>a</sup>    | 39.21±7.93 <sup>a</sup>    | 44.06±8.29 <sup>ab</sup>   | 46.45±8.62 <sup>ab</sup>   | 47.94±8.65 <sup>ab</sup>   | 48.81±8.58 <sup>ab</sup>   | 49.31±8.45 <sup>ab</sup>   | 49.56±8.33 <sup>bc</sup>   | 49.80±8.21 <sup>bc</sup>   |
| HT x C                                              | 0.42±0.15 <sup>a</sup>     | 0.17±0.10 <sup>bc</sup>    | 0.26±0.03 <sup>a</sup>     | 4.34±1.09 <sup>bcdde</sup> | 27.64±3.17 <sup>a</sup>    | 44.84±3.82 <sup>a</sup>    | 55.65±4.13 <sup>a</sup>    | 61.80±4.23 <sup>c</sup>    | 65.66±4.34 <sup>a</sup>    | 68.06±4.15 <sup>a</sup>    | 69.75±4.18 <sup>a</sup>    | 70.83±4.44 <sup>a</sup>    | 71.98±4.42 <sup>a</sup>    |
| HT x F0.5                                           | 0.30±0.03 <sup>ab</sup>    | 0.25±0.05 <sup>ab</sup>    | 0.23±0.03 <sup>a</sup>     | 7.01±3.57 <sup>abcd</sup>  | 27.98±4.21 <sup>a</sup>    | 39.90±1.71 <sup>a</sup>    | 45.89±0.16 <sup>ab</sup>   | 49.14±1.06 <sup>ab</sup>   | 51.10±1.51 <sup>ab</sup>   | 52.14±1.68 <sup>ab</sup>   | 52.86±1.71 <sup>ab</sup>   | 53.27±1.69 <sup>abc</sup>  | 53.68±1.77 <sup>abc</sup>  |
| HT x F1                                             | 0.39±0.07 <sup>a</sup>     | 0.36±0.09 <sup>a</sup>     | 0.35±0.08 <sup>a</sup>     | 3.30±2.32 <sup>bcdde</sup> | 11.77±5.12 <sup>b</sup>    | 17.49±5.23 <sup>cd</sup>   | 20.82±4.93 <sup>cd</sup>   | 24.82±3.58 <sup>cd</sup>   | 22.61±4.49 <sup>cd</sup>   | 23.74±4.15 <sup>cd</sup>   | 24.82±3.58 <sup>cd</sup>   | 25.10±3.36 <sup>de</sup>   | 25.34±3.22 <sup>de</sup>   |
| HT x F1.5                                           | 0.35±0.04 <sup>a</sup>     | 0.31±0.04 <sup>ab</sup>    | 0.28±0.04 <sup>a</sup>     | 0.65±0.53 <sup>c</sup>     | 3.72±4.30 <sup>b</sup>     | 7.37±7.44 <sup>cd</sup>    | 9.75±9.00 <sup>d</sup>     | 11.14±9.74 <sup>d</sup>    | 11.92±9.99 <sup>d</sup>    | 12.31±9.93 <sup>d</sup>    | 12.57±9.76 <sup>d</sup>    | 12.75±9.65 <sup>e</sup>    | 12.99±9.68 <sup>e</sup>    |
| HT x F2                                             | 0.35±0.08 <sup>a</sup>     | 0.29±0.10 <sup>ab</sup>    | 0.26±0.10 <sup>a</sup>     | 0.96±0.81 <sup>de</sup>    | 4.07±3.31 <sup>b</sup>     | 6.77±4.63 <sup>cd</sup>    | 8.56±5.02 <sup>d</sup>     | 9.68±4.95 <sup>d</sup>     | 10.47±4.79 <sup>d</sup>    | 11.03±4.55 <sup>d</sup>    | 11.40±4.21 <sup>d</sup>    | 11.69±3.89 <sup>e</sup>    | 11.98±3.56 <sup>e</sup>    |
| HT x F2.5                                           | 0.30±0.05 <sup>ab</sup>    | 0.24±0.03 <sup>ab</sup>    | 0.22±0.05 <sup>ab</sup>    | 0.38±0.15 <sup>c</sup>     | 1.79±0.77 <sup>b</sup>     | 3.77±1.13 <sup>d</sup>     | 5.13±1.71 <sup>d</sup>     | 5.09±1.21 <sup>d</sup>     | 6.29±1.19 <sup>d</sup>     | 6.60±1.21 <sup>d</sup>     | 6.86±1.26 <sup>d</sup>     | 7.03±1.26 <sup>e</sup>     | 7.22±1.27 <sup>e</sup>     |
| <i>p</i> /CTR (%)                                   | 0.532 <sup>NS</sup> /3.5   | 0.003 <sup>**</sup> /13.5  | 0.003 <sup>**</sup> /15.0  | 0.000 <sup>***</sup> /19.7 | 0.000 <sup>***</sup> /23.5 | 0.000 <sup>***</sup> /23.2 | 0.000 <sup>***</sup> /26.0 | 0.000 <sup>***</sup> /26.0 | 0.000 <sup>***</sup> /26.8 | 0.000 <sup>***</sup> /27.5 | 0.000 <sup>***</sup> /28.0 | 0.000 <sup>***</sup> /28.5 | 0.000 <sup>***</sup> /29.2 |

UNT-untreated films; HT-heat-treated films; C-control film; F0.5-film with 0.5% tarragon essential oil; F1-film with 1% tarragon essential oil; F1.5-film with 1.5% tarragon essential oil; F2-film with 2% tarragon essential oil; F2.5-film with 2.5% tarragon essential oil; *p*-probability; CTR (%)-percentage contribution. Values are expressed as mean ± standard deviation of three replicates. Different letters in the same column indicate statistically significant differences at  $p < 0.05$  (Tukey's test). Significance:  $p \geq 0.05$ <sup>NS</sup>, not significant;  $p < 0.01$ <sup>\*\*</sup>, very significant;  $p < 0.001$ <sup>\*\*\*</sup>, extremely significant.

**Table S4.** Effects of heat-treatment of the film-forming solution, the addition of tarragon essential oil, and their first-degree interaction on puncture resistance and puncture deformation of edible films.

| <b>Factor</b>                                       | <b>Puncture Resistance (N/mm)</b> | <b>Puncture Deformation (mm)</b> |
|-----------------------------------------------------|-----------------------------------|----------------------------------|
| Heat-treatment                                      |                                   |                                  |
| UNT                                                 | 1.6 <sup>b</sup>                  | 6.5 <sup>a</sup>                 |
| HT                                                  | 3.3 <sup>a</sup>                  | 5.1 <sup>b</sup>                 |
| <i>p</i> /CTR (%)                                   | 0.000 <sup>***</sup> /19.0        | 0.000 <sup>***</sup> /18.8       |
| Addition of tarragon essential oil                  |                                   |                                  |
| C                                                   | 4.9 <sup>a</sup>                  | 7.8 <sup>a</sup>                 |
| F0.5                                                | 1.6 <sup>c</sup>                  | 5.3 <sup>bc</sup>                |
| F1                                                  | 1.6 <sup>c</sup>                  | 4.6 <sup>c</sup>                 |
| F1.5                                                | 1.6 <sup>c</sup>                  | 5.3 <sup>bc</sup>                |
| F2                                                  | 1.4 <sup>c</sup>                  | 5.1 <sup>c</sup>                 |
| F2.5                                                | 3.6 <sup>b</sup>                  | 6.6 <sup>ab</sup>                |
| <i>p</i> /CTR (%)                                   | 0.000 <sup>***</sup> /48.6        | 0.000 <sup>***</sup> /38.1       |
| Heat-treatment x Addition of tarragon essential oil |                                   |                                  |
| UNT x C                                             | 6.2±0.921 <sup>a</sup>            | 10.0±0.684 <sup>a</sup>          |
| UNT x F0.5                                          | 0.4±0.041 <sup>f</sup>            | 6.3±1.149 <sup>bc</sup>          |
| UNT x F1                                            | 0.4±0.098 <sup>f</sup>            | 5.3±1.190 <sup>bcd</sup>         |
| UNT x F1.5                                          | 0.4±0.078 <sup>f</sup>            | 6.1±1.312 <sup>bcd</sup>         |
| HT x F2                                             | 0.7±0.190 <sup>ef</sup>           | 5.6±1.809 <sup>bcd</sup>         |
| UNT x F2.5                                          | 1.5±0.064 <sup>de</sup>           | 5.9±0.109 <sup>bcd</sup>         |
| HT x C                                              | 3.6±0.675 <sup>b</sup>            | 5.6±0.291 <sup>bcd</sup>         |
| HT x F0.5                                           | 2.9±0.148 <sup>bc</sup>           | 4.3±0.484 <sup>cd</sup>          |
| HT x F1                                             | 2.7±0.244 <sup>bc</sup>           | 4.0±0.051 <sup>d</sup>           |
| HT x F1.5                                           | 2.8±0.169 <sup>bc</sup>           | 4.6±0.289 <sup>cd</sup>          |
| HT x F2                                             | 2.1±0.064 <sup>cd</sup>           | 4.7±0.218 <sup>cd</sup>          |
| HT x F2.5                                           | 5.6±0.791 <sup>a</sup>            | 7.2±0.737 <sup>b</sup>           |
| <i>p</i> /CTR (%)                                   | 0.000 <sup>***</sup> /28.8        | 0.000 <sup>***</sup> /24.1       |

UNT-untreated films; HT-heat-treated films; C-control film; F0.5-film with 0.5% tarragon essential oil; F1-film with 1% tarragon essential oil; F1.5-film with 1.5% tarragon essential oil; F2-film with 2% tarragon essential oil; F2.5-film with 2.5% tarragon essential oil; *p*-probability; CTR (%)-percentage contribution. Values are expressed as mean ± standard deviation of four replicates. Different letters in the same column indicate statistically significant differences at  $p < 0.05$  (Tukey's test). Significance:  $p < 0.001^{***}$ , extremely significant.
